1 **Prevalence of Visceral Leishmaniasis among Wildlife Rangers in Dinder National Park,**  
2 **Sudan.**

3  
4 **<sup>1</sup>Bashir Ibrahim, <sup>2\*</sup>Mohammed Elmadani, <sup>3</sup> Hemeda Sahar, <sup>4</sup>Mogahid Gadallh. A. Abdalh,**  
5 **<sup>5</sup>Abd Elbasit Elawad Ahmed.**

6  
7 <sup>1</sup> University of Khartoum, Faculty of Public and Environmental Health, Department of  
8 Epidemiology, Khartoum, Sudan, [kagaa2020@gmail.com](mailto:kagaa2020@gmail.com)

9 <sup>2\*</sup> University of El Imam El Mahdi, Faculty of Public Health, Department of Epidemiology,  
10 Kosti, Sudan, [elmadani88@gmail.com](mailto:elmadani88@gmail.com)

11 <sup>3</sup> University of Khartoum, Faculty of Public and Environmental Health, Department of Food  
12 Hygiene and Safety, Khartoum, Sudan, [sahragad111@gmail.com](mailto:sahragad111@gmail.com) , ORCID iD: [0009-0001-3322-](https://orcid.org/0009-0001-3322-1091)  
13 [1091](https://orcid.org/0009-0001-3322-1091)

14 <sup>4</sup> Department of Environmental Health and Food Control – Federal Ministry of Health,  
15 Khartoum, Sudan, [mogahidgadallh@gmail.com](mailto:mogahidgadallh@gmail.com)

16 <sup>5</sup> University of Khartoum, Faculty of Public and Environmental Health, Department of Health  
17 Education, Khartoum, Sudan, [healthabdalbasit@gmail.com](mailto:healthabdalbasit@gmail.com).

18

19

20

21

22

23

24

25 **Corresponding Authors:**

26 **\*Mohammed Elmadani:** Lecturer of Public Health and Epidemiology, University of El Imam  
27 El Mahdi, Faculty of Public Health, Department of Epidemiology, Kosti, Sudan, 27711.

28 +249122334667, [elmadani88@gmail.com](mailto:elmadani88@gmail.com), [madani@mahdi.edu.sd](mailto:madani@mahdi.edu.sd), [\(0000-0002-3398-3109\) -](https://orcid.org/0000-0002-3398-3109)

29 [My ORCID](https://orcid.org/0000-0002-3398-3109)

30

31 **Abstract:**

32 **Background:** Visceral leishmaniasis (VL) is a significant public health concern in Sudan,  
33 particularly among populations exposed to vector-rich environments. This study aims to  
34 determine the prevalence of VL and associated risk factors among Wildlife Soldiers in Dinder  
35 National Park, Sudan.

36 **Methods:** A descriptive cross-sectional community-based study was conducted among 500  
37 Wildlife Soldiers in Dinder National Park. Data were collected using a pre-prepared and pre-  
38 tested questionnaire covering demographic information, risk factors, and clinical signs and  
39 symptoms of VL. Data analysis involved descriptive statistics, Chi-square tests, and logistic  
40 regression to assess associations between VL prevalence and various risk factors.

41 **Results:** The prevalence of VL was found to be 27.6%. Significant associations were observed  
42 between VL prevalence and educational level, military rank, awareness of VL signs and  
43 symptoms, awareness of VL transmission methods, awareness of VL control measures, and the  
44 practice of sleeping under a mosquito net. Soldiers with higher educational levels, those who  
45 were aware of VL transmission and control measures, and those who slept under nets had  
46 significantly lower odds of contracting VL. Conversely, lower-ranking soldiers and those with  
47 less awareness had higher prevalence rates.

48 **Conclusion:** The high prevalence of VL among Wildlife Soldiers in Dinder National Park  
49 underscores the need for targeted public health interventions. Strategies should include  
50 enhancing educational programs, improving awareness of VL prevention and control measures,  
51 and ensuring better access to protective measures such as mosquito nets. Future research should  
52 focus on longitudinal studies, detailed environmental assessments, and intervention trials to  
53 further reduce the burden of VL in this high-risk population.

54

55

56

57 **Keywords:** Visceral leishmaniasis, prevalence, risk factors, Wildlife Soldiers, Dinder National  
58 Park, Sudan, public health interventions.

59

60

61

62 **Author Summary:**

63 Visceral leishmaniasis (VL), or kala-azar, is a severe parasitic disease posing a significant health  
64 threat globally, including Sudan. This cross-sectional study investigates VL prevalence and  
65 associated risk factors among 500 Wildlife Soldiers in Dinder National Park, Sinnar State,  
66 Sudan. Data on demographics, risk factors, and VL signs were collected using a validated  
67 questionnaire. Findings reveal a 27.6% VL prevalence among soldiers, with significant  
68 associations noted for education level, military rank, VL awareness, transmission knowledge,  
69 and mosquito net use. Higher education and awareness correlated with lower VL rates, while  
70 lower-ranked and less-aware soldiers had higher prevalence. Targeted public health interventions  
71 are crucial to mitigate VL among Wildlife Soldiers, emphasizing education enhancement,  
72 awareness campaigns, and access to protective gear. Future research should focus on longitudinal  
73 studies and environmental assessments to refine VL control strategies in this high-risk  
74 population. This study enhances understanding of VL factors in Dinder National Park and  
75 advocates for robust public health initiatives to combat this disease effectively.

76  
77  
78  
79  
80  
81  
82  
83  
84  
85  
86  
87  
88  
89  
90

91 **Introduction:**

92 Visceral leishmaniasis (VL), also known as kala-azar, is a severe parasitic disease caused by  
93 protozoa of the *Leishmania* genus [1, 2]. It is transmitted through the bite of infected female  
94 phlebotomine sandflies and primarily affects internal organs such as the spleen, liver, and bone  
95 marrow[2, 3]. With an estimated 50,000 to 90,000 new cases annually, VL is a significant public  
96 health concern, particularly in tropical and subtropical regions where environmental conditions  
97 favor the sandfly vectors and the reservoirs of the parasite [2, 4-6].

98 Sudan is one of the six countries contributing to more than 90% of global VL cases[1, 7]. The  
99 disease is endemic in the eastern and central regions, where it poses a substantial health  
100 burden[8-10]. Dinder National Park, located in southeastern Sudan, is a prominent conservation  
101 area that houses diverse wildlife and is a known habitat for sandflies [11, 12]. The interaction  
102 between wildlife, sandflies, and humans in this ecological setting creates a conducive  
103 environment for the transmission of VL [13-15].

104 Visceral leishmaniasis (VL) is a significant health concern in Sudan, particularly in the central  
105 and eastern regions [8, 10]. The prevalence of VL in these areas is high, with a particularly high  
106 incidence among children [16, 17]. The disease is associated with a range of clinical symptoms,  
107 including fever, pallor, weight loss, and splenomegaly [16]. Despite the availability of treatment,  
108 VL continues to pose a public health challenge in Sudan, with a high mortality rate [17].

109 Wildlife rangers working in Dinder National Park are at heightened risk of VL due to their  
110 prolonged exposure to the park's environment. Rangers are essential for the protection and  
111 management of wildlife resources, yet their occupational activities often place them near the  
112 vector and reservoir hosts. Despite the critical role rangers play, there is a paucity of data on the  
113 prevalence of VL among this vulnerable population, limiting the implementation of targeted  
114 health interventions.

115 Understanding the prevalence of VL among wildlife rangers is vital for several reasons. First, it  
116 will highlight the occupational health risks associated with their work and the need for protective  
117 measures. Second, it will provide insights into the epidemiology of VL in a unique ecological  
118 niche, contributing to broader public health knowledge. Third, such data can inform  
119 policymakers and health authorities in developing effective strategies for disease prevention and  
120 control in similar high-risk groups.

121 This study aims to assess the prevalence of visceral leishmaniasis among wildlife rangers in  
122 Dinder National Park, Sudan. By investigating the extent of VL infection and associated risk  
123 factors in this population, we hope to provide evidence-based recommendations to improve the  
124 health and safety of wildlife rangers. Additionally, the findings may offer a model for addressing  
125 VL in other conservation areas and occupations with similar exposure risks.

126 Through this research, we seek to bridge the gap in the literature on occupational health risks of  
127 VL and emphasize the importance of integrated disease management approaches in endemic  
128 regions. This study underscores the need for continuous surveillance, enhanced diagnostic  
129 facilities, and comprehensive health education programs to mitigate the impact of VL on those  
130 most at risk.

### 131 **Materials and methods:**

132 This descriptive cross-sectional community-based study was conducted in Dinder National Park,  
133 Sinnar State, Sudan, using quantitative research methods to investigate the prevalence of  
134 Visceral Leishmaniasis (VL) and associated risk factors among Wildlife Soldiers. The study  
135 population comprised all 500 Soldiers for Wildlife in Dinder National Park, ensuring  
136 comprehensive data collection.

137 Dinder National Park, located in southeastern Sudan along the border with Ethiopia, serves as a  
138 significant study area due to its extensive biodiversity and varied ecosystems. Established in  
139 1935 and covering approximately 10,292 square kilometers, the park is named after the Dinder  
140 River, a tributary of the Blue Nile that flows through it. The park features diverse habitats,  
141 including woodlands dominated by acacia and other indigenous tree species, extensive  
142 grasslands that support a wide range of herbivores, and seasonal wetlands crucial for aquatic  
143 species. This rich habitat diversity supports an array of wildlife, including African elephants,  
144 lions, leopards, cheetahs, buffalo, giraffes, various antelope species, over 200 bird species, and  
145 numerous reptiles and amphibians. The flora of Dinder ranges from dense woodlands to open  
146 grasslands and marshy areas, further contributing to its biodiversity [18].

147 The questionnaire used for data collection was both pre-prepared and pre-tested to ensure its  
148 validity and reliability. It contained demographic information and risk factors such as mosquito  
149 net usage and awareness regarding control measures of visceral leishmaniasis, as well as self-  
150 reported questions based on clinical signs and symptoms of infection.

151 Data collection involved three primary phases. First, a validated questionnaire was administered  
152 to gather detailed information on demographic characteristics and various aspects related to VL.  
153 Second, existing medical records were reviewed to identify the prevalence of VL among the  
154 soldiers, providing insights into the incidence and management of the disease. Third, an  
155 interview was conducted with the Director of the Department of Primary Health Care in Dinder  
156 locality to collect data on the VL rate among the soldiers and to assess the quality of health  
157 services provided to them. Data were collected from wildlife rangers through face-to-face  
158 interviews in a convenient environment to ensure confidentiality.

159 Data were entered and analyzed using the Statistical Package for Social Science (SPSS), version  
160 24.0. Descriptive statistics summarized the demographic data and prevalence rates, while the  
161 associations between different variables were assessed using the Chi-square test, with a p-value  
162 of  $\leq 0.05$  considered statistically significant. Logistic regression was also performed, with  
163 calculation of Odds Ratios (OR) and 95% Confidence Intervals (CI). Bivariate analysis (Chi-  
164 square test) was conducted at a 5% significance level and 95% confidence interval to examine  
165 relationships between the prevalence of VL and risk factors variable, and binary regression  
166 (logistic regression) was used to calculate the direction of association between infection and risk  
167 factors using OR at 95% CI.

168 The Odds Ratio and corresponding 95% confidence intervals used in bivariate analysis (as crude  
169 odds ratio) and embedded in logistic regression analysis (as adjusted odds ratio) determined  
170 relationships between the prevalence of visceral leishmaniasis and several risk factors.

#### 171 **Ethics Statement:**

172 Ethical approval for this research was obtained in three stages. First, approval was secured from  
173 the Ministry of Health and Social Development, Sennar State - General Administration of Basic  
174 Health Care - Diseases Department – Kala-azar Department in 2/5/2021. Second, it was  
175 approved by the Health Services Administration of Al-Dindar Locality, under the number A K S  
176 / M D / 50/ 1, 4/5/2021. Finally, the Police Presidency of the Dinder Federal Park, affiliated with  
177 the General Administration for Wildlife Protection, headed by the Police Forces - Ministry of  
178 Interior, granted approval under the number A A H H B/M D/M1/, 4/5/2021. Additionally,  
179 verbal consent was obtained from the Wildlife Soldiers prior to conducting the interviews.

180

181

182 **Result:**

183 **Demographic characteristics:**

184 The study included a total of 500 participants, predominantly male (93%) with only 7% female.

185 The age distribution showed that 13.4% of the participants were under 20 years old, 68% were  
186 between 20 and 30 years old, and 18.6% were over 30 years old.

187 Regarding religious affiliation, 95.4% of the participants were Muslim, while 4.6% identified as

188 non-Muslim. The marital status of the participants was nearly evenly split, with 45.8% married,

189 45.2% single, 8% divorced, and 1% widowed. In terms of educational level, 12% were illiterate,

190 14.2% had completed primary school, 60.8% had a high school education, and 13% were

191 graduates. Monthly income levels varied, with 8% of the participants earning a low income,

192 69.4% earning a medium income, and 22.6% earning a high income. Family size was categorized

193 into three groups: 25.4% had less than five members, 53.6% had between five and eight

194 members, and 21% had more than nine members. Participants' years of experience in their roles

195 showed that 8.6% had less than one year of experience, 45.8% had between two and five years of

196 experience, and 45.6% had over five years of experience. Regarding military rank, 15.6% of the

197 participants were officers, while the majority, 84.4%, were soldiers. All these demographic

198 characteristics are indicated in the **(Table 1)**

199 **Prevalence of VL and associated factors:**

200 The prevalence of visceral leishmaniasis (VL) among the participants was 27.6%, with 138

201 individuals reported positive, while 72.4%, or 362 individuals, reported negative. **(Figure 1)**

202 Regarding previous VL infections, 7.4% of the participants reported having an infection within

203 the past month, 11% reported an infection within the past year, and 10.6% reported an infection

204 more than a year ago. The majority, 71%, reported no previous VL infection. **(Figure 2)**

205 The study revealed the following associations between various demographic and risk factors with

206 the prevalence of visceral leishmaniasis (VL) **(Table 2)**.

207 Among illiterate participants, 16 individuals (3.20%) reported positive for VL, and 44 (8.80%)

208 reported negative. Participants with a primary school education had 29 individuals (5.80%) test

209 positive and 42 (8.40%) test negative, with an Odds Ratio (OR) of 1.895 (95% Confidence

210 Interval [CI]: 0.901 - 3.983), compared to the illiterate group. Those with a high school

211 education had 67 individuals (13.40%) test positive and 237 (47.40%) test negative, with an OR

212 of 0.777 (95% CI: 0.413 - 1.462). Among graduates, 26 individuals (5.20%) tested positive and



213 39 (7.80%) tested negative, with an OR of 1.833 (95% CI: 0.861 - 3.906). The p-value for  
214 educational level was 0.001, indicating a statistically significant difference.

215 Participants with a low income had 14 individuals (2.80%) test positive and 26 (5.20%) test  
216 negative. Those with a medium income had 96 individuals (19.20%) test positive and 251  
217 (50.20%) test negative, with an OR of 0.71 (95% CI: 0.36 - 1.42). Participants with a high  
218 income had 28 individuals (5.60%) test positive and 85 (17.00%) test negative, with an OR of  
219 0.61 (95% CI: 0.28 - 1.33). The p-value for family income was 0.352, indicating no statistically  
220 significant difference.

221 Among officers, 33 individuals (6.60%) tested positive for VL, and 45 (9.00%) tested negative.  
222 Soldiers had 105 individuals (21.00%) test positive and 317 (63.40%) test negative, with an OR  
223 of 0.45 (95% CI: 0.27 - 0.75). The p-value for military rank was 0.004, indicating a statistically  
224 significant difference.

225 Participants who were aware of the signs and symptoms of VL had 128 individuals (25.60%) test  
226 positive and 260 (52.00%) test negative. Those who were not aware had 10 individuals (2.00%)  
227 test positive and 102 (20.40%) test negative, with an OR of 0.20 (95% CI: 0.10 - 0.39). The p-  
228 value for awareness about signs and symptoms was 0.000, indicating a statistically significant  
229 difference.

230 Participants aware of VL transmission methods had 120 individuals (24.00%) test positive and  
231 255 (51.00%) test negative. Those unaware had 18 individuals (3.60%) test positive and 107  
232 (21.40%) test negative, with an OR of 0.36 (95% CI: 0.21 - 0.61). The p-value for awareness  
233 about VL transmission methods was 0.000, indicating a statistically significant difference.

234 Participants aware of VL control methods had 124 individuals (24.80%) test positive and 307  
235 (61.40%) test negative. Those unaware had 14 individuals (2.80%) test positive and 55 (11.00%)  
236 test negative, with an OR of 0.63 (95% CI: 0.34 - 1.18). The p-value for awareness about control  
237 of VL was 0.012, indicating a statistically significant difference.

238 Participants who slept under a net had 44 individuals (8.80%) test positive and 172 (34.40%) test  
239 negative. Those who did not sleep under a net had 94 individuals (18.80%) test positive and 190  
240 (38.00%) test negative, with an OR of 1.93 (95% CI: 1.28 - 2.92). The p-value for sleeping under  
241 the net was 0.001, indicating a statistically significant difference.

242 **Interview Results:**



243 Interviews were conducted with the Director of the Department of Primary Health Care in  
 244 Dinder Locality to explore perspectives on the factors contributing to the high prevalence of  
 245 visceral leishmaniasis among Wildlife Soldiers in Dander, Sinnar State. The 2021 interview  
 246 results revealed several key insights. According to the Director, Wildlife Soldiers stationed in  
 247 forested areas are at heightened risk due to the presence of leishmania vectors, increasing their  
 248 susceptibility to infection compared to other populations. Additionally, many soldiers lack  
 249 adequate protective equipment such as mosquito nets, and even those who possess them often do  
 250 not use them consistently. These factors likely contribute to the elevated prevalence of visceral  
 251 leishmaniasis in the area.

252 **Table 1: Demographic characteristics of wildlife soldiers in Dinder National Park, Sudan, (n**  
 253 **= 500).**

| Characteristic             | Frequency | %    |
|----------------------------|-----------|------|
| <b>Sex</b>                 |           |      |
| Male                       | 465       | 93   |
| Female                     | 35        | 7    |
| <b>Age groups</b>          |           |      |
| <20                        | 67        | 13.4 |
| 20 – 30                    | 340       | 68   |
| >30                        | 93        | 18.6 |
| <b>Religion</b>            |           |      |
| Muslim                     | 477       | 95.4 |
| Not Muslim                 | 23        | 4.6  |
| <b>Marital status</b>      |           |      |
| Married                    | 229       | 45.8 |
| Single                     | 226       | 45.2 |
| Divorce                    | 40        | 8    |
| Widow                      | 5         | 1    |
| <b>Educational level</b>   |           |      |
| Illiterate                 | 60        | 12   |
| Primary school             | 71        | 14.2 |
| High school                | 304       | 60.8 |
| Graduate                   | 65        | 13   |
| <b>Monthly income</b>      |           |      |
| Low                        | 40        | 8    |
| Medial                     | 347       | 69.4 |
| High                       | 113       | 22.6 |
| <b>Family size</b>         |           |      |
| <5                         | 127       | 25.4 |
| 5 – 8                      | 268       | 53.6 |
| >9                         | 105       | 21   |
| <b>Years of Experience</b> |           |      |
| <1 year                    | 43        | 8.6  |
| 2 - 5 years                | 229       | 45.8 |
| >5 years                   | 228       | 45.6 |
| <b>Military rank</b>       |           |      |
| Officer                    | 78        | 15.6 |
| Soldier                    | 422       | 84.4 |

254 **Table 2: Relationship between prevalence of VL and risk factors among wildlife soldiers in**  
 255 **Dinder National Park, Sudan, (n = 500).**

| Variable                                 | Category       | Positive (%) | Negative (%) | Total (%)   | P-value | OR (95% CI)           |
|------------------------------------------|----------------|--------------|--------------|-------------|---------|-----------------------|
| Educational Level                        | Illiterate     | 16 (3.20)    | 44 (8.80)    | 60 (12.00)  | 0.001   | --                    |
|                                          | Primary school | 29 (5.80)    | 42 (8.40)    | 71 (14.20)  |         | 1.895 (0.901 - 3.983) |
|                                          | High school    | 67 (13.40)   | 237 (47.40)  | 304 (60.80) |         | 0.777 (0.413 - 1.462) |
|                                          | Graduate       | 26 (5.20)    | 39 (7.80)    | 65 (13.00)  |         | 1.833 (0.861 - 3.906) |
| Family Income                            | Low            | 14 (2.80)    | 26 (5.20)    | 40 (8.00)   | 0.352   | --                    |
|                                          | Medium         | 96 (19.20)   | 251 (50.20)  | 347 (69.40) |         | 0.71 (0.36 - 1.42)    |
|                                          | High           | 28 (5.60)    | 85 (17.00)   | 113 (22.60) |         | 0.61 (0.28 - 1.33)    |
| Military Rank                            | Officer        | 33 (6.60)    | 45 (9.00)    | 78 (15.60)  | 0.004   | --                    |
|                                          | Soldier        | 105 (21.00)  | 317 (63.40)  | 422 (84.40) |         | 0.45 (0.27 - 0.75)    |
| Awareness about Signs and Symptoms of VL | Yes            | 128 (25.60)  | 260 (52.00)  | 388 (77.60) | 0.000   | --                    |
|                                          | No             | 10 (2.00)    | 102 (20.40)  | 112 (22.40) |         | 0.20 (0.10 - 0.39)    |
| Awareness about VL Transmission Methods  | Yes            | 120 (24.00)  | 255 (51.00)  | 375 (75.00) | 0.000   | --                    |
|                                          | No             | 18 (3.60)    | 107 (21.40)  | 125 (25.00) |         | 0.36 (0.21 - 0.61)    |
| Awareness about Control of VL            | Yes            | 124 (24.80)  | 307 (61.40)  | 431 (86.20) | 0.012   | --                    |
|                                          | No             | 14 (2.80)    | 55 (11.00)   | 69 (13.80)  |         | 0.63 (0.34 - 1.18)    |
| Sleeping under the Net                   | Yes            | 44 (8.80)    | 172 (34.40)  | 216 (43.20) | 0.001   | --                    |
|                                          | No             | 94 (18.80)   | 190 (38.00)  | 284 (56.80) |         | 1.93 (1.28 - 2.92)    |

256

257

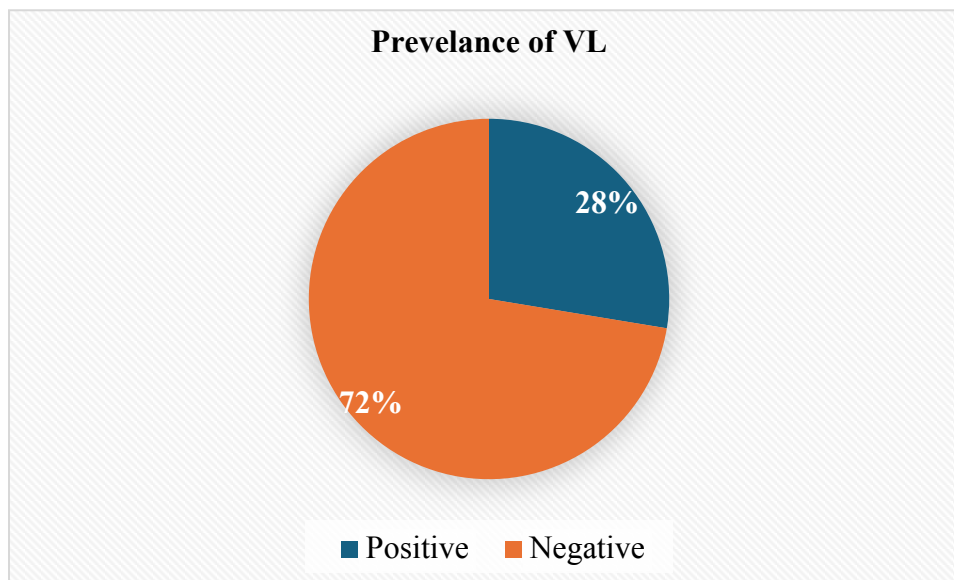

258

259 **Figure I: Self-reported Prevalence of VL among wildlife rangers in Dinder National Park,**  
 260 **Sudan, (n = 500).**

261

262

263

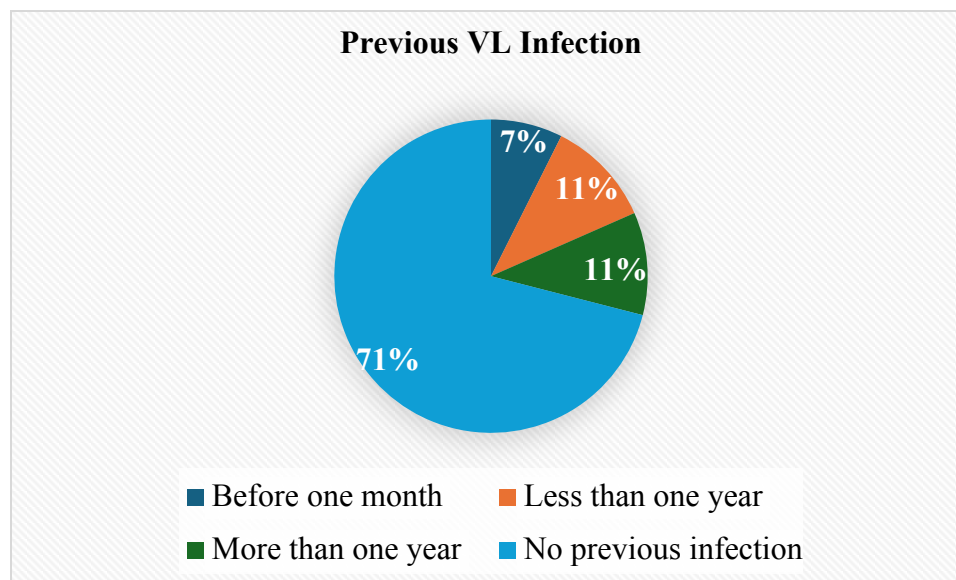

264

265 **Figure II: Previous infection with VL among wildlife soldiers in Dinder National Park,**  
266 **Sudan, (n = 500).**

## 267 Discussion

268 This study investigated the prevalence of visceral leishmaniasis (VL) and associated risk factors  
269 among Wildlife Soldiers in Dinder National Park, Sudan. The findings revealed significant  
270 associations between VL prevalence and various demographic and risk factors, including  
271 educational level, military rank, awareness of VL signs and symptoms, awareness of VL  
272 transmission methods, awareness of VL control measures, and the practice of sleeping under a  
273 mosquito net. The prevalence of VL in this study was 27.6%, which is alarmingly high compared  
274 to global averages, particularly in regions outside of endemic areas. This high prevalence aligns  
275 with findings from studies conducted in other parts of Sudan and East Africa, where  
276 environmental conditions and socio-economic factors contribute to higher rates of infection. A  
277 recent systematic review by [10] in Sudan revealed that the overall pooled prevalence of human  
278 leishmaniasis in the country is 21%. Cutaneous leishmaniasis (CL) is the most common type,  
279 with a prevalence of 26%, followed by visceral leishmaniasis (VL) at 18%. Notably, the  
280 prevalence of VL reported in [10] review is lower than that observed in our current study. The  
281 review also indicates that central Sudan has the highest prevalence of human leishmaniasis at  
282 27%, which aligns with the findings of our current study in the same region. However, the  
283 overall prevalence of human leishmaniasis appears to be decreasing over time [10]. Another  
284 study by [16], conducted in Eastern Gedaref State, Sudan, among children, reported that 47 out

285 of 145 suspected cases (32%) were identified as having VL. This prevalence is higher than that  
286 among adults, indicating that children are more likely to contract VL. The study also found a  
287 significant association between rural residence, male gender, and VL among children. This  
288 suggests that rural areas are higher-risk zones due to socioeconomic conditions, poor housing,  
289 and inadequate sanitary conditions. Similarly, in the same eastern region, [17] reported that VL  
290 represents a significant health burden in the villages of Eastern Gedaref State, being one of the  
291 major causes of death in the area. The study conducted by [19] investigated the clinical and  
292 demographic features of visceral leishmaniasis (VL) in an African population. The findings  
293 indicate that males are at a higher risk than females, with the majority of patients being children  
294 under 15 years old. A similar study [20] conducted in Gadaref, Eastern Sudan, also reported that  
295 children and men are at higher risk of visceral leishmaniasis (VL). This increased risk among  
296 children is attributed to their tendency to play outside, making them more likely to be exposed to  
297 the sandfly vectors that transmit the *Leishmania* parasites. For men, the higher risk is due to their  
298 likelihood of working in outdoor environments, such as farming and forestry, where they are  
299 more frequently exposed to sandflies. The association between educational level and VL  
300 prevalence was significant, with illiterate participants having a higher prevalence of infection  
301 (3.20%). This finding suggests that education plays a crucial role in disease prevention and  
302 awareness. Similar results have been reported in other studies, where higher educational levels  
303 correlated with lower prevalence rates of various infectious diseases, including VL. The ORs  
304 indicate that primary school and graduate participants had increased odds of VL compared to  
305 illiterate participants, though not statistically significant. Family income was not significantly  
306 associated with VL prevalence in this study. However, those with low and medium incomes had  
307 higher prevalence rates compared to those with high income. This finding is consistent with  
308 previous research indicating that lower socio-economic status is often linked to higher rates of  
309 VL due to limited access to healthcare and preventive measures. The lack of statistical  
310 significance might be due to the relatively small sample size or other confounding factors not  
311 accounted for in this study. Military rank showed a significant association with VL prevalence,  
312 with soldiers having a higher prevalence (21.00%) compared to officers (6.60%). This disparity  
313 may be attributed to differences in living conditions, exposure to infected sandflies, and access to  
314 protective measures. Similar patterns have been observed in other occupational health studies,  
315 where lower-ranking personnel often face greater exposure to occupational hazards. Awareness

316 about the signs and symptoms of VL, transmission methods, and control measures was  
317 significantly associated with lower prevalence rates. Participants who were aware of these  
318 aspects had a much lower prevalence of VL. This finding underscores the importance of health  
319 education and awareness campaigns in controlling the spread of VL. Previous studies have also  
320 highlighted the critical role of awareness and education in reducing the incidence of VL and  
321 other vector-borne diseases. The practice of sleeping under a mosquito net was significantly  
322 associated with lower VL prevalence. Participants who did not sleep under a net had nearly twice  
323 the odds of contracting VL compared to those who did. This finding aligns with extensive  
324 research demonstrating the effectiveness of insecticide-treated nets in reducing the transmission  
325 of vector-borne diseases, including malaria and VL.

### 326 **Conclusion**

327 This study highlights the critical need for targeted public health interventions to reduce the  
328 prevalence of VL among Wildlife Soldiers in Dinder National Park. Key strategies should  
329 include educational programs to raise awareness about VL, its transmission, and preventive  
330 measures, along with efforts to improve living conditions and access to protective measures such  
331 as mosquito nets. Addressing these factors could significantly reduce the burden of VL in this  
332 high-risk population.

### 333 **Implications for Future Research:**

334 The findings of this study highlight several key areas for future research to further understand  
335 and mitigate the burden of visceral leishmaniasis (VL) among Wildlife Soldiers in Dinder  
336 National Park, Sudan.

337 Detailed epidemiological studies are needed to track the incidence and prevalence of VL over  
338 time, identifying seasonal variations and long-term trends. These studies should explore the role  
339 of environmental factors specific to Dinder National Park, such as climate patterns, wildlife  
340 interactions, and habitat characteristics, in influencing VL transmission dynamics.

341 Research into socio-economic and behavioral factors is crucial. This includes investigating the  
342 socio-economic determinants of health that contribute to VL risk, focusing on the impacts of  
343 poverty, education, and access to healthcare services. Assessing the effectiveness of current  
344 health education programs and developing targeted interventions to improve awareness and  
345 preventive behaviors among different demographic groups within the soldier population is also  
346 important.

347 Intervention strategies should be evaluated to determine the effectiveness of various preventive  
348 measures, such as insecticide-treated nets, personal protective equipment, and environmental  
349 management, in reducing VL transmission. Community-based intervention trials should be  
350 implemented and assessed to determine the best practices for VL control in the context of  
351 Wildlife Soldiers and other at-risk populations in similar settings.

352 The accessibility and quality of healthcare services available to Wildlife Soldiers need to be  
353 examined, focusing on diagnostic capabilities, treatment availability, and overall healthcare  
354 infrastructure. Qualitative research is necessary to understand the barriers to healthcare access  
355 and utilization, including cultural beliefs, stigma, and logistical challenges.

356 Molecular and genetic studies can provide valuable insights into the specific strains of  
357 Leishmania parasites circulating in the region and their potential resistance to standard  
358 treatments. Exploring the genetic susceptibility of the local population to VL, identifying  
359 potential genetic markers that could inform personalized treatment and prevention strategies, is  
360 also important.

361 Occupational health and safety research should investigate the specific conditions that increase  
362 exposure to sandflies and other vectors associated with wildlife conservation work. Developing  
363 and evaluating occupational health and safety programs tailored to the unique needs and risks  
364 faced by Wildlife Soldiers is crucial.

365 Collaboration between local, national, and international health organizations should be fostered  
366 to share knowledge, resources, and best practices for VL control. Policy changes that support the  
367 allocation of resources to VL research, prevention, and treatment programs should be advocated  
368 for ensuring sustained efforts to combat the disease.

369 By addressing these research areas, future studies can provide a more comprehensive  
370 understanding of VL in Dinder National Park and contribute to the development of effective,  
371 evidence-based interventions to reduce the burden of this disease among Wildlife Soldiers and  
372 other vulnerable populations.

### 373 **Limitations:**

374 This study, while providing valuable insights into the prevalence of visceral leishmaniasis (VL)  
375 and associated risk factors among Wildlife Soldiers in Dinder National Park, Sudan, has several  
376 limitations that should be considered when interpreting the results.

377 First, the cross-sectional design of the study limits the ability to establish causal relationships  
378 between identified risk factors and VL prevalence. While associations can be observed, it is not  
379 possible to determine the direction of these relationships or infer causality.

380 Second, the reliance on self-reported data for certain variables, such as awareness of VL signs  
381 and symptoms and use of mosquito nets, may introduce reporting bias. Participants might over-  
382 report positive behaviors or under-report negative behaviors due to social desirability bias.

383 Third, the study's focus on Wildlife Soldiers may limit the generalizability of the findings to  
384 other populations. The unique environmental and occupational conditions faced by Wildlife  
385 Soldiers in Dinder National Park might not reflect those experienced by the general population or  
386 other occupational groups in Sudan or other regions.

387 Fourth, the study did not account for potential confounding variables that could influence the  
388 observed associations. Factors such as nutritional status, other underlying health conditions, and  
389 genetic predispositions were not controlled for, which may affect the study's findings.

390 Fifth, the sample size, while comprehensive for the Wildlife Soldiers in Dinder National Park,  
391 may still be limited for certain subgroup analyses. Small sample sizes within specific categories,  
392 such as those with low educational levels or low income, might reduce the statistical power to  
393 detect significant differences.

394 Sixth, the use of a single diagnostic method for VL prevalence may not capture all cases  
395 accurately. Misclassification of cases, either false positives or false negatives, could affect the  
396 prevalence estimates and the strength of associations with risk factors.

397 Seventh, the study did not include detailed environmental and ecological data, which are crucial  
398 for understanding the transmission dynamics of VL. Factors such as vector density, habitat  
399 characteristics, and climatic conditions were not assessed, limiting the ability to fully understand  
400 the environmental determinants of VL risk.

401 Lastly, the study period and timing might influence the results. Seasonal variations in sandfly  
402 activity and VL transmission could affect prevalence rates, and the study might not capture these  
403 temporal dynamics accurately.

404 Acknowledging these limitations is essential for contextualizing the findings and guiding future  
405 research efforts to address these gaps and build a more comprehensive understanding of VL in  
406 this high-risk population.

407 **Data Availability:**



408 The data that support the findings of this study are available from the corresponding author upon  
409 reasonable request.

410 **Funding:**

411 This research received no specific grant from any funding agency in the public, commercial, or  
412 not-for-profit sectors.

413 **Competing interests:**

414 The authors declare that they have no competing interests.

415 **Authorship contributions:**

416 **BI** and **ME** contributed to the conception of the work. **ME**, **HS**, **MGAA**, and **BI** were involved  
417 in drafting the article, data analysis, and critical revision of the article. **AE** gave final approval of  
418 the version to be published. All authors read and finalized the article and agreed to its  
419 publication.

420

421 **References:**

- 422 1. Scarpini S, Dondi A, Totaro C, Biagi C, Melchionda F, Zama D, et al. Visceral  
423 Leishmaniasis: Epidemiology, Diagnosis, and Treatment Regimens in Different Geographical  
424 Areas with a Focus on Pediatrics. *Microorganisms*. 2022;10(10)  
425 <https://doi.org/10.3390/microorganisms10101887>.
- 426 2. WHO. Leishmaniasis: Key facts: World Health Organization; 2023 [Available from:  
427 [https://www.who.int/news-room/fact-](https://www.who.int/news-room/fact-sheets/detail/leishmaniasis#:~:text=Leishmania%20parasites%20are%20transmitted%20through,the%20source%20of%20Leishmania%20parasites)  
428 [sheets/detail/leishmaniasis#:~:text=Leishmania%20parasites%20are%20transmitted%20through,](https://www.who.int/news-room/fact-sheets/detail/leishmaniasis#:~:text=Leishmania%20parasites%20are%20transmitted%20through,the%20source%20of%20Leishmania%20parasites)  
429 [the%20source%20of%20Leishmania%20parasites](https://www.who.int/news-room/fact-sheets/detail/leishmaniasis#:~:text=Leishmania%20parasites%20are%20transmitted%20through,the%20source%20of%20Leishmania%20parasites).
- 430 3. Veras PST, de Santana MBR, Brodskyn CI, Fraga DBM, Solcà MS, De Menezes JPB, et  
431 al. Elucidating the role played by bone marrow in visceral leishmaniasis. *Front Cell Infect*  
432 *Microbiol*. 2023;13:1261074 <https://doi.org/10.3389/fcimb.2023.1261074>.
- 433 4. Medenica S, Miladinović-Tasić N, Stojanović NM, Lakićević N, Rakočević B. Climate  
434 Variables Related to the Incidence of Human Leishmaniosis in Montenegro in Southeastern  
435 Europe during Seven Decades (1945-2014). *Int J Environ Res Public Health*. 2023;20(3)  
436 <https://doi.org/10.3390/ijerph20031656>.

- 437 5. Bi K, Chen Y, Zhao S, Kuang Y, John Wu CH. Current Visceral Leishmaniasis  
438 Research: A Research Review to Inspire Future Study. *Biomed Res Int*. 2018;2018:9872095  
439 <https://doi.org/10.1155/2018/9872095>.
- 440 6. Alvar J, Vélez ID, Bern C, Herrero M, Desjeux P, Cano J, et al. Leishmaniasis  
441 Worldwide and Global Estimates of Its Incidence. *PLOS ONE*. 2012;7(5):e35671  
442 <https://doi.org/10.1371/journal.pone.0035671>.
- 443 7. Alvar J, Vélez ID, Bern C, Herrero M, Desjeux P, Cano J, et al. Leishmaniasis worldwide  
444 and global estimates of its incidence. *PLoS One*. 2012;7(5):e35671  
445 <https://doi.org/10.1371/journal.pone.0035671>.
- 446 8. Zijlstra EE, el-Hassan AM. Leishmaniasis in Sudan. *Visceral leishmaniasis*. *Trans R Soc*  
447 *Trop Med Hyg*. 2001;95 Suppl 1:S27-58 [https://doi.org/10.1016/s0035-9203\(01\)90218-4](https://doi.org/10.1016/s0035-9203(01)90218-4).
- 448 9. Knight CA, Harris DR, Alshammari SO, Gugssa A, Young T, Lee CM. Leishmaniasis:  
449 Recent epidemiological studies in the Middle East. *Front Microbiol*. 2022;13:1052478  
450 <https://doi.org/10.3389/fmicb.2022.1052478>.
- 451 10. Ahmed M, Abdulslam Abdullah A, Bello I, Hamad S, Bashir A. Prevalence of human  
452 leishmaniasis in Sudan: A systematic review and meta-analysis. *World J Methodol*.  
453 2022;12(4):305-18 <https://doi.org/10.5662/wjmv12.i4.305>.
- 454 11. UNESCO. Dinder National Park 2021 [Available from:  
455 <https://whc.unesco.org/en/tentativelists/6515/>.
- 456 12. Elnaiem DA, Connor SJ, Thomson MC, Hassan MM, Hassan HK, Aboud MA, et al.  
457 Environmental determinants of the distribution of *Phlebotomus orientalis* in Sudan. *Ann Trop*  
458 *Med Parasitol*. 1998;92(8):877-87 <https://doi.org/10.1080/00034989858925>.
- 459 13. Salah I, Abbasi I, Warburg A, Davidovitch N, Kotler B. Ecology of Leishmaniasis in an  
460 urbanized landscape: Relationship of sand fly densities, and *Leishmania tropica* infection rates  
461 with reservoir host colonies. *Acta Tropica*. 2020;204:105332  
462 <https://doi.org/https://doi.org/10.1016/j.actatropica.2020.105332>.
- 463 14. Posada-López L, Velez-Mira A, Cantillo O, Castillo-Castañeda A, Ramírez JD, Galati  
464 EAB, et al. Ecological interactions of sand flies, hosts, and *Leishmania panamensis* in an  
465 endemic area of cutaneous leishmaniasis in Colombia. *PLoS Negl Trop Dis*.  
466 2023;17(5):e0011316 <https://doi.org/10.1371/journal.pntd.0011316>.

- 467 15. Bucheton B, Kheir MM, El-Safi SH, Hammad A, Mergani A, Mary C, et al. The  
468 interplay between environmental and host factors during an outbreak of visceral leishmaniasis in  
469 eastern Sudan. *Microbes Infect.* 2002;4(14):1449-57 [https://doi.org/10.1016/s1286-](https://doi.org/10.1016/s1286-4579(02)00027-8)  
470 [4579\(02\)00027-8](https://doi.org/10.1016/s1286-4579(02)00027-8).
- 471 16. Ahmed MAA, Ahmed AA, Omar SM, Adam GK, Abdallah TM, Ali AA. Epidemiology  
472 of visceral leishmaniasis among children in Gadarif hospital, eastern Sudan. *BMC Public Health.*  
473 2016;16(1):1234 <https://doi.org/10.1186/s12889-016-3875-2>.
- 474 17. Mueller YK, Nackers F, Ahmed KA, Boelaert M, Djoumessi J-C, Eltigani R, et al.  
475 Burden of Visceral Leishmaniasis in Villages of Eastern Gedaref State, Sudan: An Exhaustive  
476 Cross-Sectional Survey. *PLOS Neglected Tropical Diseases.* 2012;6(11):e1872  
477 <https://doi.org/10.1371/journal.pntd.0001872>.
- 478 18. H. M. Sulieman and MHM. Patterns of Woody Plant Species Composition and Diversity  
479 in Dinder National Park, Sudan. *University of Kordofan Journal of Natural Resources and*  
480 *Environmental Studies.* 2014;1(1):26-36.
- 481 19. A MN, A MI. Visceral leishmaniasis: Clinical and demographic features in an African  
482 population. *Pak J Med Sci.* 2013;29(2):485-9 <https://doi.org/10.12669/pjms.292.3151>.
- 483 20. Nackers F, Mueller YK, Salih N, Elhag MS, Elbadawi ME, Hammam O, et al.  
484 Determinants of Visceral Leishmaniasis: A Case-Control Study in Gedaref State, Sudan. *PLOS*  
485 *Neglected Tropical Diseases.* 2015;9(11):e0004187  
486 <https://doi.org/10.1371/journal.pntd.0004187>.
- 487
